# Supplementary material for: Chamber identity programs drive early functional partitioning of the heart
Source: PubMed Central journal article supplement (PMC4560818; doi:10.1038/ncomms9146), 2015-08-26
Supplement: ncomms9146-s1.pdf [file ncomms9146-s1.pdf]

# Supplementary Figure 1 - Mosimann, Panáková, et al.

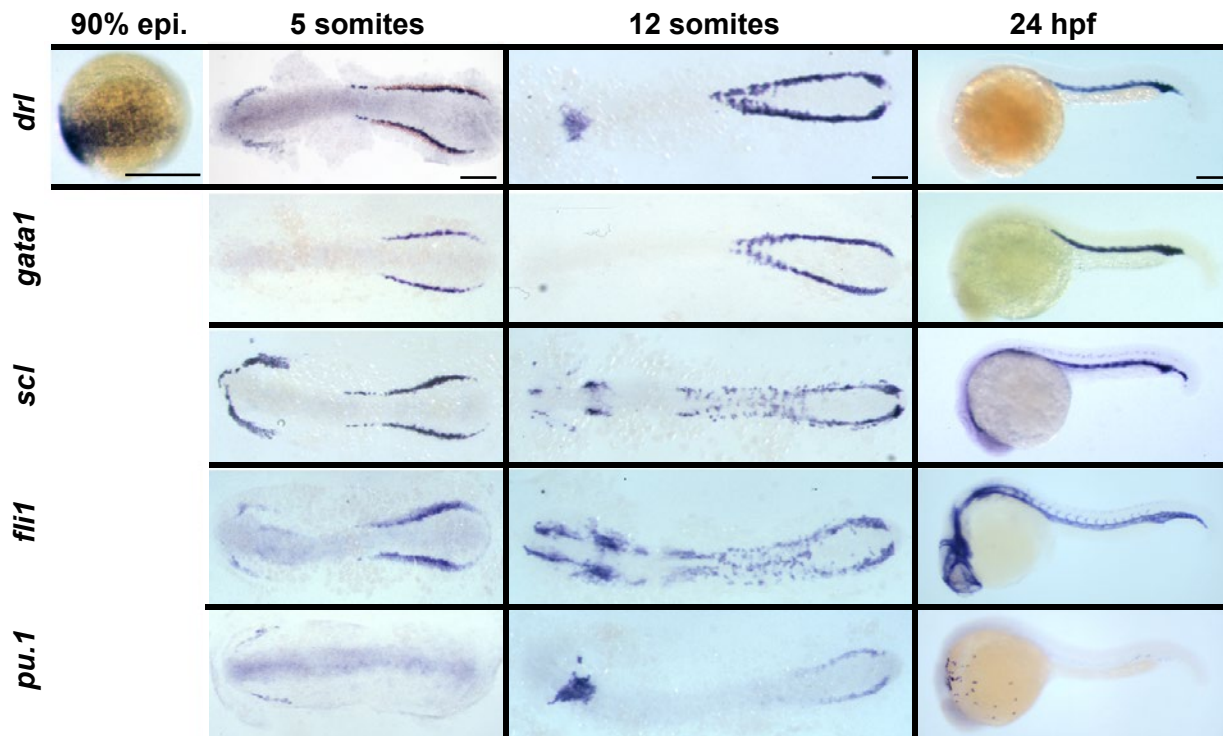

**Supplementary Fig. 1.** Zebrafish *drl* is transcribed earlier than traditional blood markers, labels the forming lateral mesoderm, and subsequently restricts expression into cardiovascular and hematopoietic lineages. Panel of classic marker genes expressed in hematopoietic populations, scale bars = 200  $\mu\text{m}$ ; the epiboly-stage embryo is animal to the top, ventral (V) to the right, dorsal (D) to the left; later stages (flat mounts and 24 hpf whole mounts) are anterior (A) to the left, posterior (P) to the right; note prominent expression of all genes in the Intermediate Cell Mass (ICM) at 24 hpf, except the myeloid marker *pu.1* which is expressed in the anterior myeloid precursors.

## Supplementary Figure 2 - Mosimann, Panáková, et al.

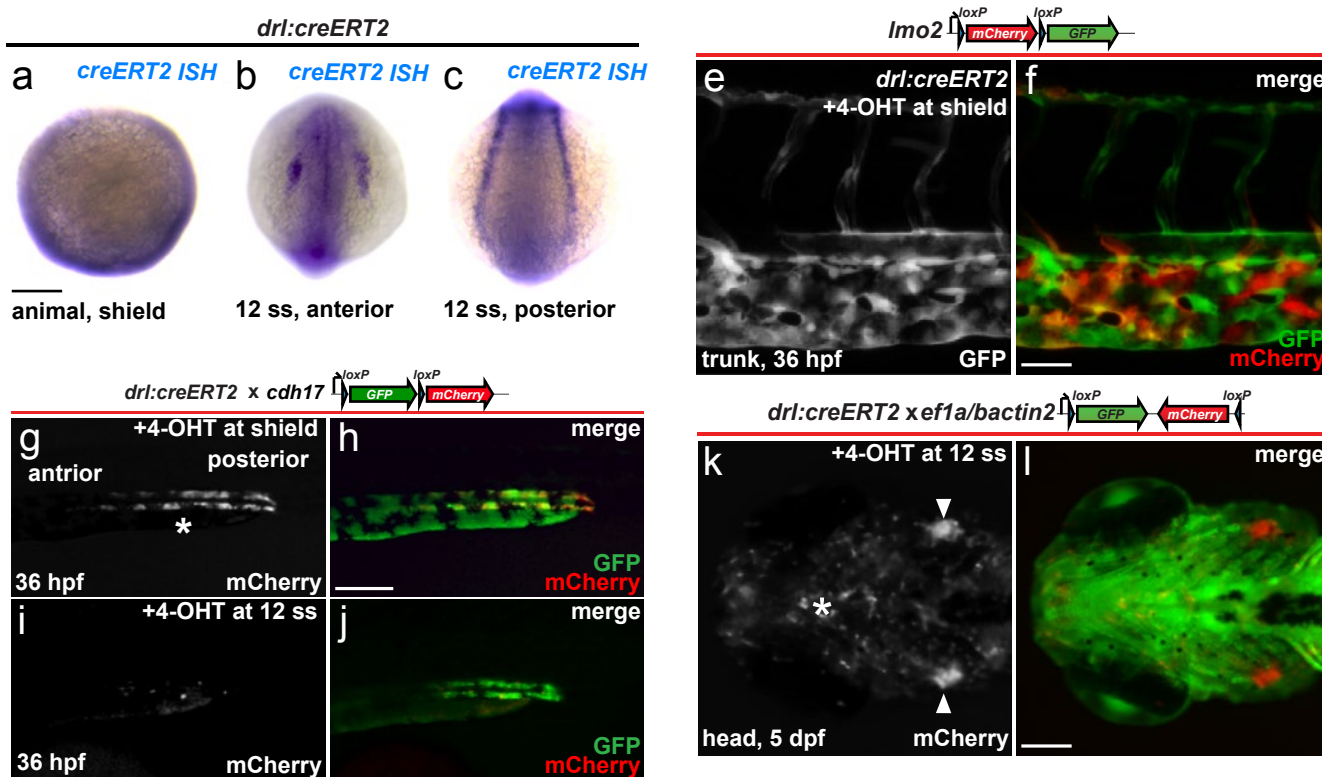

**Supplementary Fig. 2.** *drl* reporter expression refines to anterior and posterior cardiovascular lineages over time. (a-c) mRNA *in situ* hybridization (ISH) for *creERT2* in *drl:creERT2* embryos shows expression at shield stage (a, animal pole view, ventral on top) at the embryo margin, and at 12 somite stage (b, c) shows the separation of *drl* reporter expression into anterior and posterior lateral mesoderm; scale bar = 100  $\mu$ m. (e, f) Vascular lineage tracing confirmed using *drl:creERT2* crossed to the endothelial-specific *loxP* reporter *Imo2:Switch* (schematic) and 4-OHT-induced at shield stage, tracing (GFP signal, green) shown in the trunk at 36 hpf; scale bar = 50  $\mu$ m. (g-j) Transgenic zebrafish carrying *drl:creERT2* crossed to *cdh17:loxP-GFP-loxP-mCherry* (schematic) were induced with 4-OHT at shield or 12 somite stage; mCherry expression in the renal tubules reveals *drl* expression in their precursors during gastrulation (g, h), but not at later stages of somitogenesis (i, j); scale bar = 100  $\mu$ m. (k, l) Definitive hematopoietic lineages descend from *drl*-expressing cells at 12 ss, as shown in a 5-day larva with tracing to the developing bilateral thymus (arrowheads, k) and tissue-infiltrating leukocytes (asterisks, k) using the *ef1a/beta-actin2*-based *FLEX* reporter line (schematic); scale bar = 100  $\mu$ m.

# Supplementary Figure 3 - Mosimann, Panáková, et al.

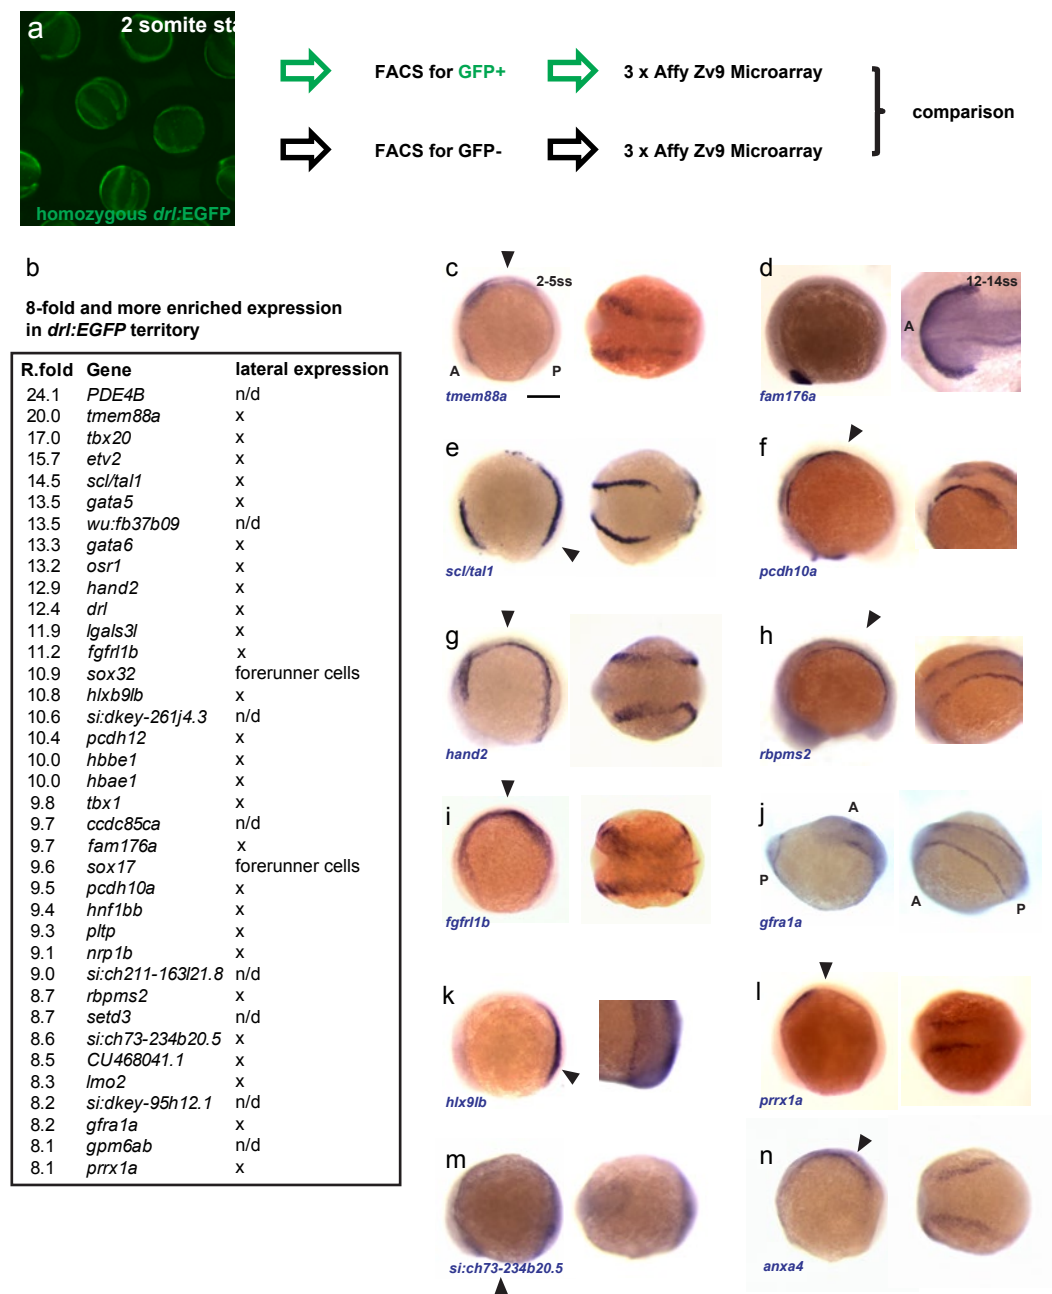

**Supplementary Fig. 3.** The transcriptome of the *drl*-positive lateral mesoderm at the beginning of segmentation. (a), schematic of the performed Affymetrix Zv9 microarray experiment; 2 somite stage *drl:EGFP* homozygous embryos were collected, dissociated, their EGFP-positive and -negative cell populations separated by FACS, the isolated RNA from both populations was subjected to microarray analysis, and the resulting gene expression lists from both populations compared. This resulted in a list of genes that are preferentially expressed in the *drl*-positive lateral territory. (b), excerpt of the enriched gene list (8-fold or higher), including expression analysis by RNA ISH. (c-n), validation of lateral expression by mRNA ISH for selected candidates from the microarray analysis; for each gene, a lateral view (left, anterior (A) to the left, posterior (P) to the right) and detail view (right, point of view shown by arrow head in lateral view) is shown for 2-5 ss embryos if not depicted otherwise; scale bar = 100  $\mu$ m.

# Supplementary Figure 4 - Mosimann, Panáková, et al.

*drl:EGFP*, 56 hpf

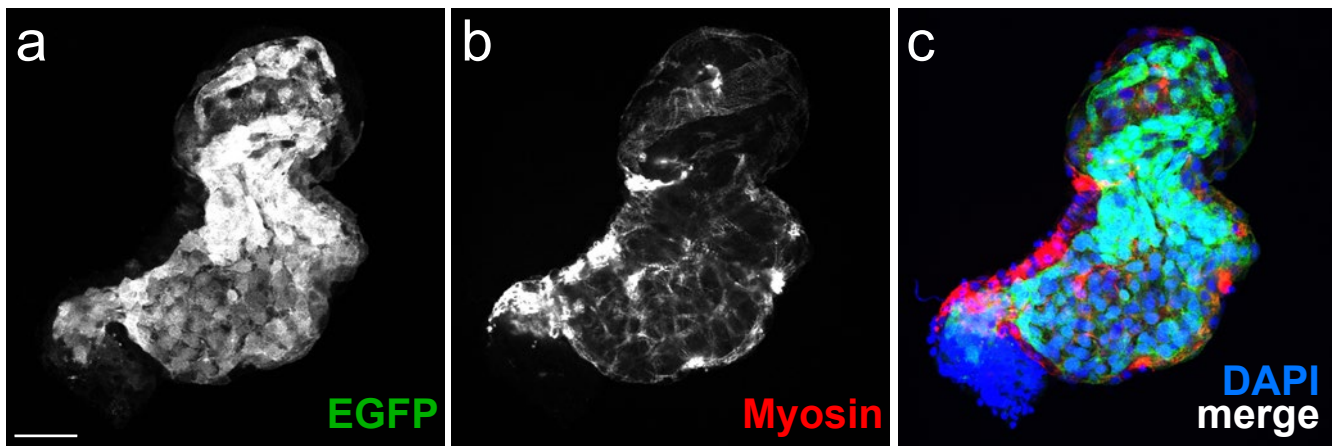

**Supplementary Fig. 4.** Endocardial activity of *drl*-expressing reporters. (a-c) Medial confocal section through a 56 hpf zebrafish heart transgenic for *drl:EGFP* (green) to reveal expression of *drl:EGFP* in the central Myosin-negative endocardium; counter-stained cardiac Myosin/MF20 (red), DAPI (blue) as nuclear stain. Ventricular outer curvature (OC) myocardium is clearly GFP-positive, while GFP signal is absent from inner curvature (IC) myocardium. Scale bars = 50  $\mu$ m.

## Supplementary Figure 5 - Mosimann, Panáková, et al.

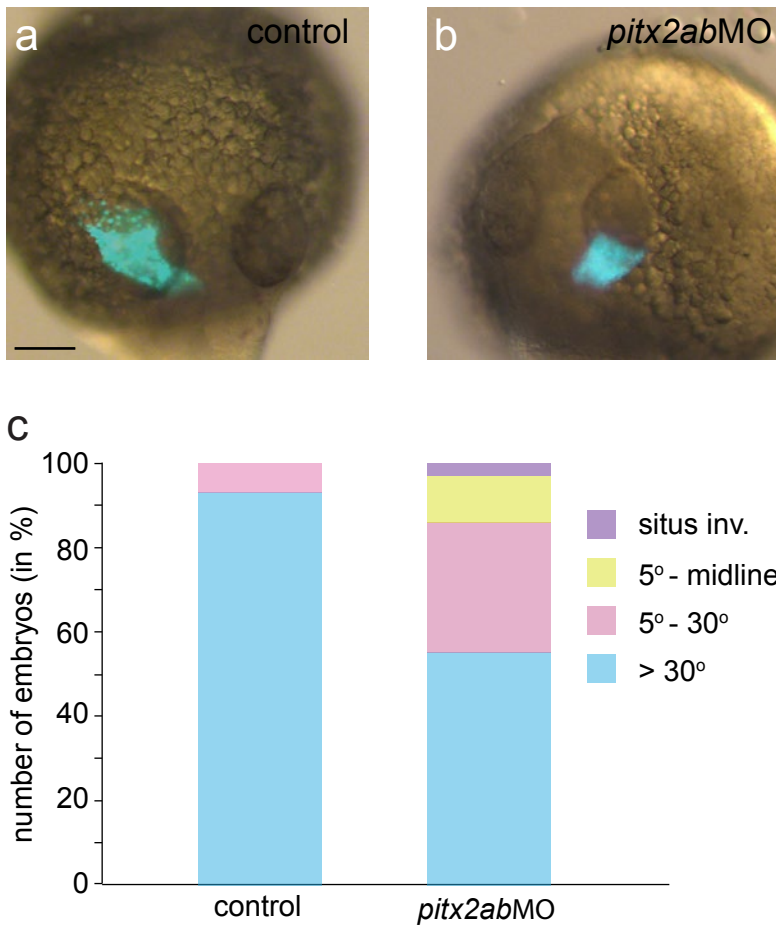

**Supplementary Fig. 5.** Validation of morpholino-mediated *pitx2ab* knockdown. Scale bar = 100  $\mu$ m. (a-c) 24 hpf heart tube positioning in wildtype control (a) shows normal left tilt of the heart tube referred to as jog, while *pitx2ab* morphants produce random jog (b shown to the right, c statistical representation of phenotype distribution).

Supplementary Figure 6 - Mosimann, Panáková, et al.

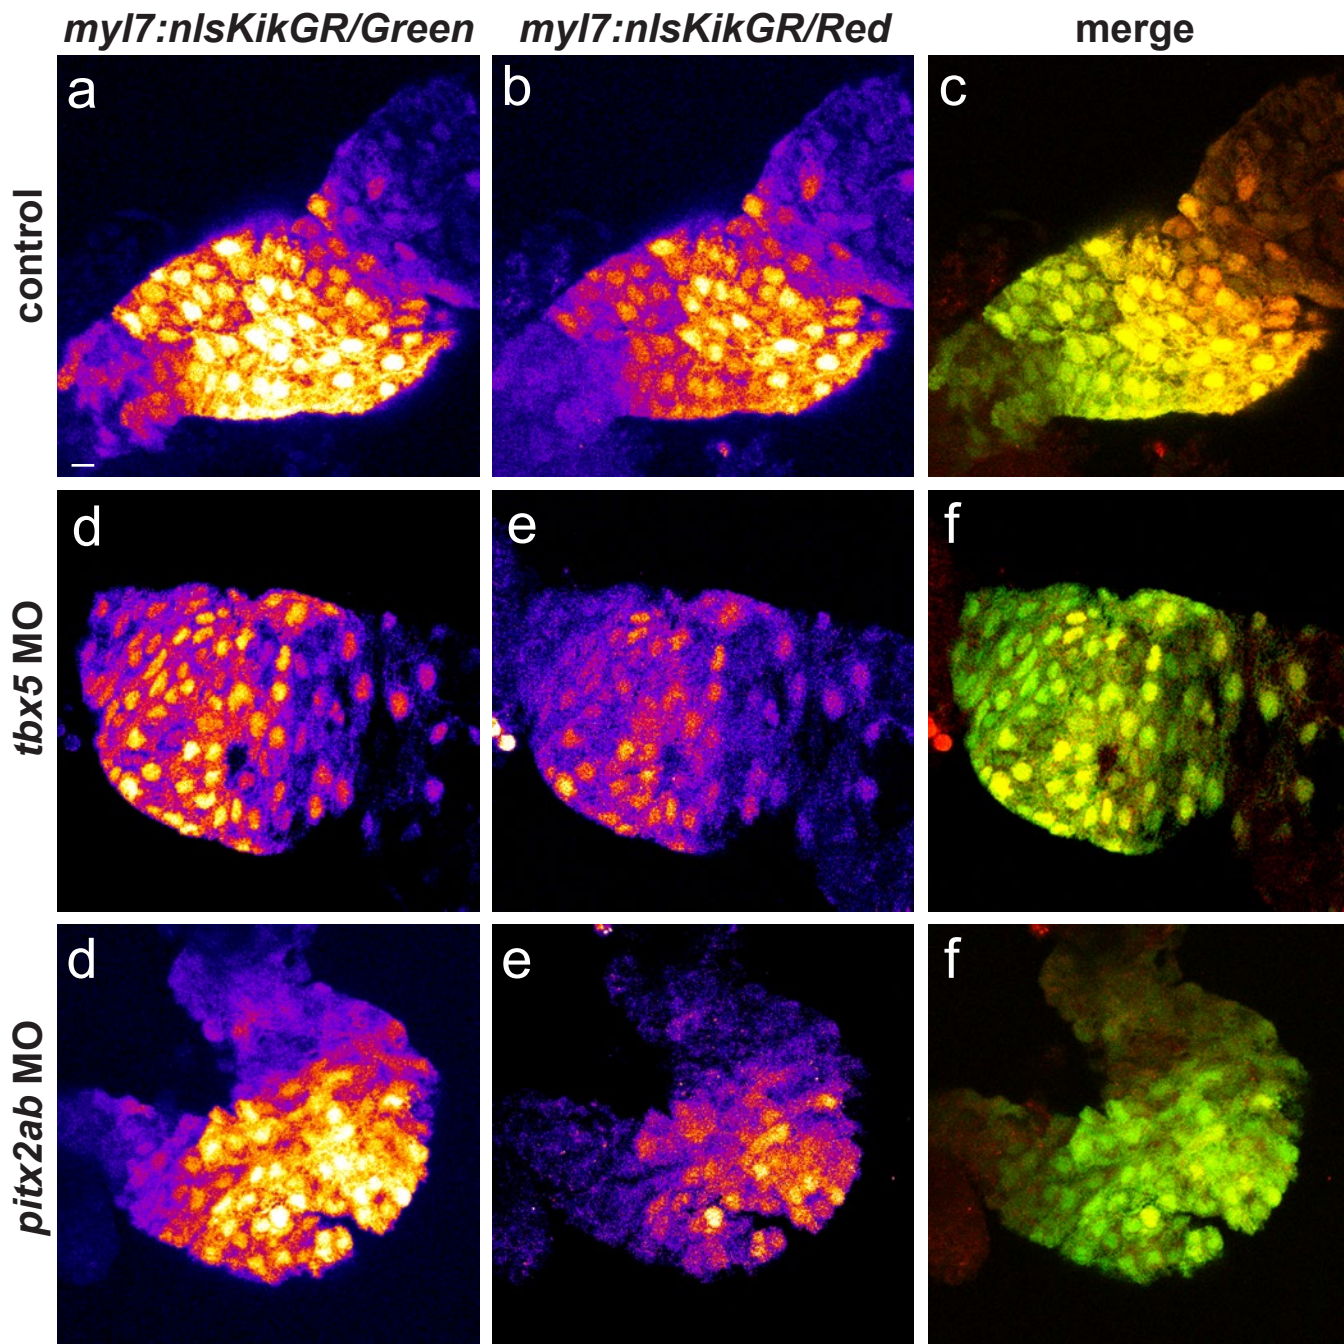

**Supplementary Fig. 6.** Impact of *tbx5a* and *pitx2ab* knockdown on SHF addition to the FHF. Scale bar = 10  $\mu$ m. (a-i) Photoconversion-mediated lineage tracing of the SHF cardiomyocytes addition to the linear heart tube. Photoconversion of cardiomyocyte-specific Tg(*myl7:nlsKikGR*) was performed at 365 nm for 2 minutes at 27 hpf and the hearts imaged at 56 hpf; the total conversion to RFP was visually confirmed. **a, d, g,** shows the green channel, **b, e, h,** shows the red channel, merge is shown in **c, f, i.** All GFP-positive nuclei are the newly added cardiomyocytes after 27hpf, RFP-labeled nuclei represents all cardiomyocytes of the linear heart tube prior to photoconversion, yellow in merge (**c, f, i**). **a-c,** control hearts, **d-f,** hearts from *tbx5a* morphants show mild decrease in newly added cardiomyocytes, **g-i,** hearts from *pitx2ab* morphants display increase in cardiomyocyte recruitment.

Supplementary Figure 7 - Mosimann, Panáková, et al.

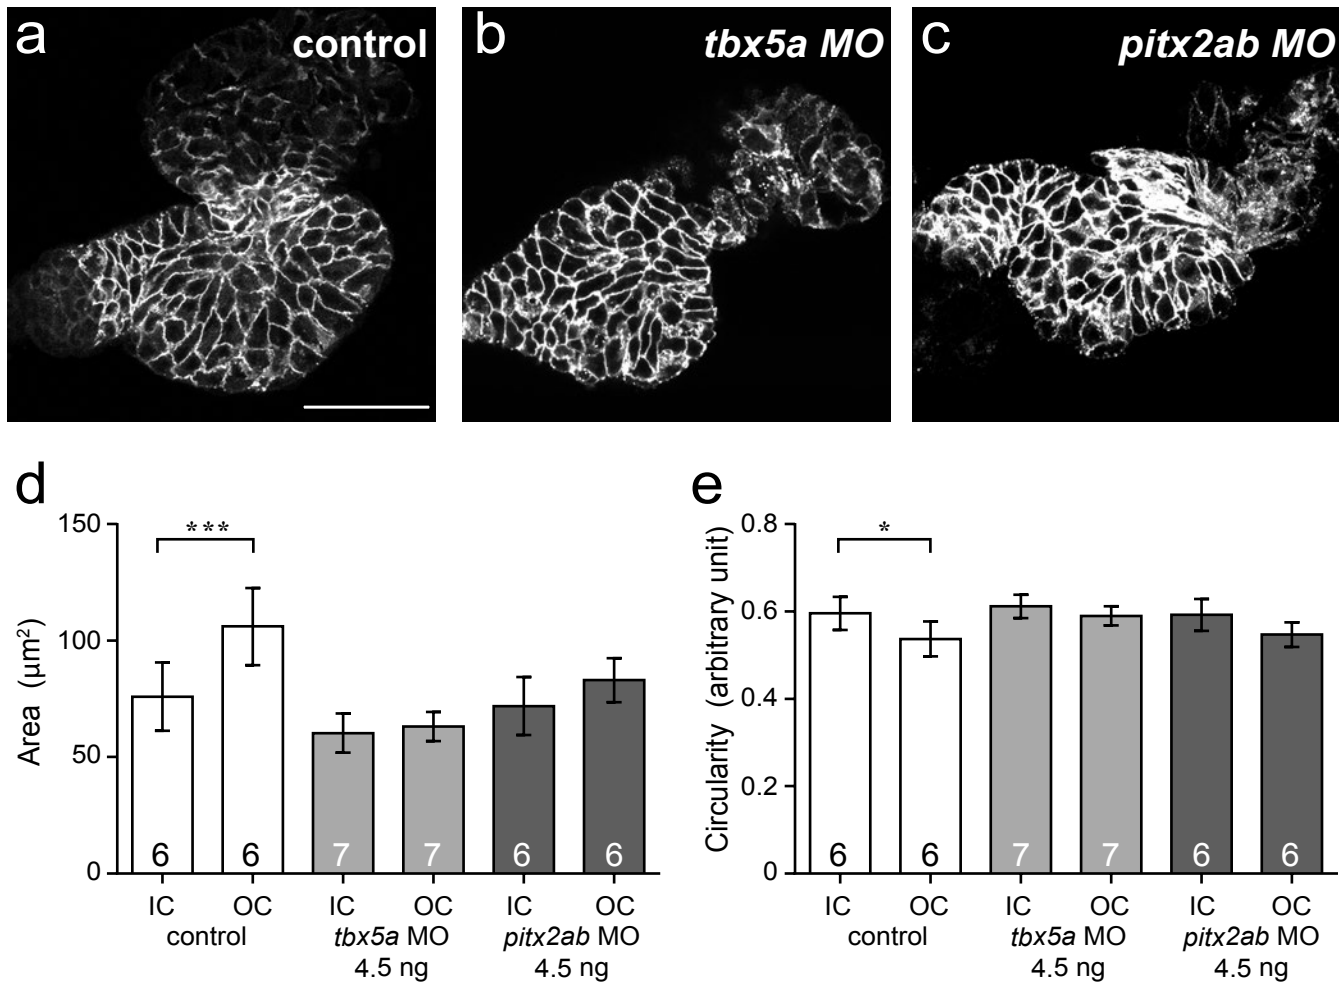

**Supplementary Fig. 7.** Morphology of hearts in loss of *tbx5a* and *pitx2ab* is altered. (**a-c**) Apical 1  $\mu\text{m}$  confocal sections through 72 hpf zebrafish hearts stained for membrane marker (zn-8) from control (**a**), *tbx5a* morpholino knockdown (**b**), and *pitx2ab* morpholino knockdown (**c**) embryos; scale bar = 50  $\mu\text{m}$ . (**d**, **e**) Graphs compare the area (**d**) and circularity (**e**) of the ventricular cardiomyocytes between inner and outer curvature in control hearts and in heart with the loss of *tbx5a* and *pitx2ab*. Statistical significance tested with One-way Anova, with Tukey's post test,  $p < 0.05$ . Both, *tbx5a* and *pitx2ab* knockdown results in smaller (**d**) and more circular (**e**) cells. The changes are more apparent in the hearts from *tbx5a* knockdown embryos resembling the morphology of the primitive linear heart tube stage.

# Supplementary Figure 8 - Mosimann, Panáková, et al.

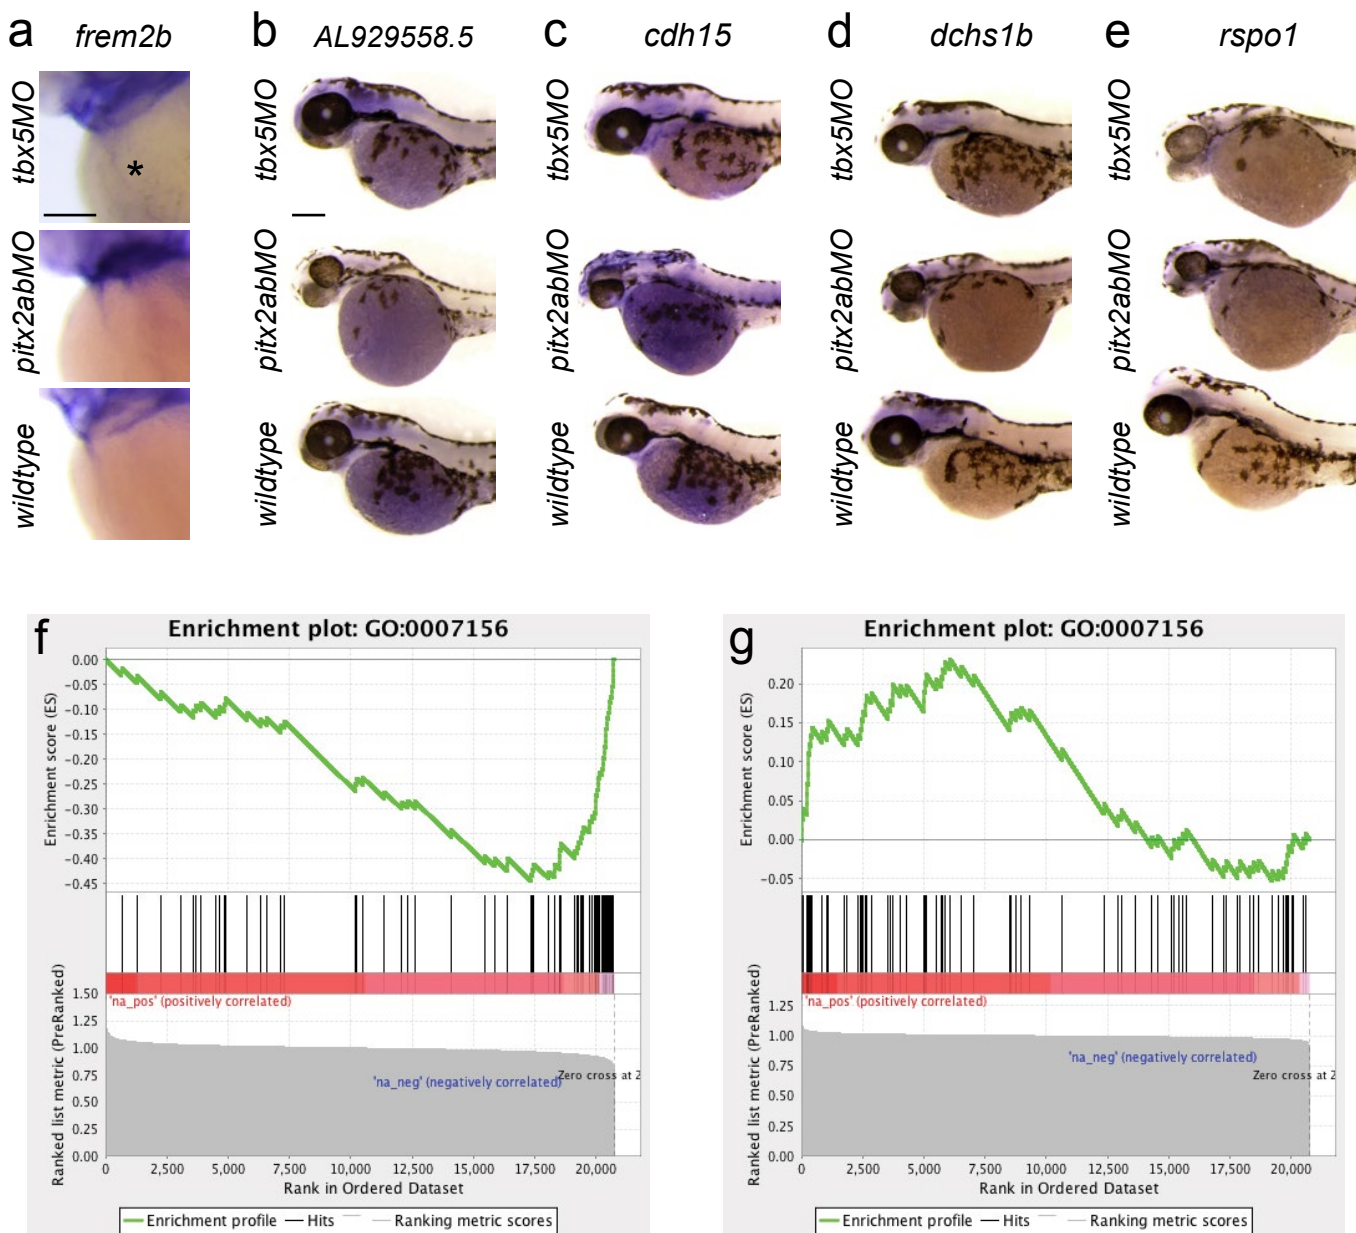

**Supplementary Fig. 8.** Microarray candidates and GSEA from *tbx5a* versus *pitx2ab* morphant analysis. **(a-e)** mRNA *in situ* hybridization of genes that are significantly de-regulated in *tbx5a* versus *pitx2ab* knockdown conditions; images show head portions of zebrafish embryos at 52-56hpf, anterior to the left; scale bars = 100  $\mu$ m. **(f, g)** Analysis of transcriptional profiling results; Gene Set Enrichment Analysis (GSEA) was run using gene lists pre-ranked based on transcriptional changes following knockdown of either *pitx2ab* or *tbx5a* (see **Methods**). Genes annotated as being involved in ‘homophilic cell adhesion’ (GO:0007156) were found to be significantly down-regulated in *pitx2ab* **(f)** morphants, and up-regulated in *tbx5a* **(g)** morphants ( $q < 0.05$ ). Within each panel, the enrichment score (ES; upper plot) is a running sum statistic, wherein positive deviation from 0 indicates enrichment for a given gene set at the top of the ranked list, and negative deviation indicates enrichment at the bottom. Barcoding (middle plot) indicates observation of genes from the tested gene set at the indicated position of the ranked list. The bottom plot shows the value of the ranking metric throughout the ordered set.



# Supplementary Table 1 - Mosimann, Panáková, et al.

| EnsID              | Gene Name         | fc pitx2   | fc tbx5     |
|--------------------|-------------------|------------|-------------|
| ENSDARG00000087940 | BX323820.1        | 1.24968054 | 1.004838129 |
| ENSDARG00000069473 | frem1a            | 1.07649046 | 0.976489157 |
| ENSDARG00000019726 | celsr2l           | 1.05804161 | 0.974822079 |
| ENSDARG00000074369 | frem2b            | 1.04309679 | 0.984909698 |
| ENSDARG00000045403 | CABZ01090951.1    | 1.03824797 | 0.990486055 |
| ENSDARG00000024371 | cdh1              | 1.03469349 | 1.01309126  |
| ENSDARG00000092450 | si:dkey-173l11.3  | 1.03264144 | 0.999870437 |
| ENSDARG00000018923 | FAT2              | 1.0326209  | 0.987662207 |
| ENSDARG00000052232 | pcdh15a           | 1.03091294 | 1.00313398  |
| ENSDARG00000087126 | FP245455.1        | 1.03060741 | 1.02457116  |
| ENSDARG00000017591 | fat1              | 1.03035885 | 0.980478918 |
| ENSDARG00000062608 | pcdh1g2           | 1.02876044 | 1.042587419 |
| ENSDARG00000058259 | celsr1b           | 1.0253861  | 0.972178112 |
| ENSDARG00000008127 | pcdh15b           | 1.02445006 | 1.013102365 |
| ENSDARG00000095430 | zgc:123181        | 1.02357711 | 1.036662384 |
| ENSDARG00000057773 | si:dkey-27i16.3   | 1.02338216 | 0.995123222 |
| ENSDARG00000068191 | cdh15             | 1.01915002 | 0.989320553 |
| ENSDARG00000058546 | si:dkey-30c15.12  | 1.01708046 | 0.994055119 |
| ENSDARG00000035796 | si:ch211-206i14.2 | 1.01701507 | 1.007563512 |
| ENSDARG00000005112 | cdh17             | 1.01597583 | 0.996452008 |
| ENSDARG00000075960 | CDH24 (1 of 2)    | 1.01360808 | 1.009821275 |
| ENSDARG00000078404 | CDH26             | 1.01310635 | 0.985132569 |
| ENSDARG00000077570 | CDH16             | 1.01136868 | 1.003446462 |
| ENSDARG00000095360 | si:ch211-213b8.4  | 1.00937371 | 1.02616892  |
| ENSDARG00000070025 | DCHS1 (1 of 2)    | 1.00628395 | 0.986217408 |
| ENSDARG00000017649 | CDH7 (1 of 2)     | 1.00582169 | 0.995529588 |
| ENSDARG00000060830 | FAM83H (2 of 2)   | 1.00509293 | 0.990597511 |
| ENSDARG00000069185 | celsr1a           | 1.00288413 | 0.990009466 |
| ENSDARG00000075549 | cdh5              | 1.00275658 | 1.008299739 |
| ENSDARG00000044048 | prnpb             | 1.00195859 | 0.953012547 |
| ENSDARG00000089176 | CDHR2 (2 of 2)    | 1.00118411 | 1.005467932 |
| ENSDARG00000004643 | cdhr1a            | 0.9991     | 1.008732392 |
| ENSDARG00000007561 | cdh23             | 0.99683352 | 1.009890099 |
| ENSDARG00000021442 | cdh11             | 0.9961231  | 0.992573861 |
| ENSDARG00000014522 | cdh6              | 0.99491589 | 0.983112278 |
| ENSDARG00000018693 | cdh2              | 0.99218507 | 0.979475461 |
| ENSDARG00000074991 | CDH19             | 0.99165734 | 0.985443487 |
| ENSDARG00000035660 | si:ch211-193k19.1 | 0.98892123 | 1.002311832 |
| ENSDARG00000090275 | CDHR5 (2 of 2)    | 0.98517063 | 0.991858159 |

|                    |                 |            |             |
|--------------------|-----------------|------------|-------------|
| ENSDARG00000079247 | si:dkey-22o22.2 | 0.9847161  | 0.997820168 |
| ENSDARG00000055305 | ret             | 0.98215505 | 0.97322505  |
| ENSDARG00000023542 | cdh7            | 0.98003261 | 0.989719557 |
| ENSDARG00000045665 | FAT4            | 0.97794861 | 0.989708405 |
| ENSDARG00000060610 | pcdh7b          | 0.97765589 | 1.01698595  |
| ENSDARG00000075268 | CABZ01034923.1  | 0.97753773 | 1.023656889 |
| ENSDARG00000034344 | pcdh19          | 0.9765819  | 0.993951373 |
| ENSDARG00000052494 | pcdh18b         | 0.9763079  | 0.982816677 |
| ENSDARG00000076594 | PCDH12          | 0.97563846 | 0.998822318 |
| ENSDARG00000078088 | CR339051.1      | 0.97544847 | 1.007322077 |
| ENSDARG00000033840 | FAT3            | 0.97534296 | 0.998267174 |
| ENSDARG00000071894 | pcdh2g3         | 0.96917781 | 0.9815546   |
| ENSDARG00000036175 | pcdh1b          | 0.96908761 | 1.003026252 |
| ENSDARG00000060637 | clstn2          | 0.96832727 | 0.992002415 |
| ENSDARG00000031720 | clstn1          | 0.96789779 | 0.979453389 |
| ENSDARG00000060638 | CLSTN2 (1 of 2) | 0.96314352 | 1.011384676 |
| ENSDARG00000036424 | PCDH20          | 0.96182338 | 1.008769206 |
| ENSDARG00000054274 | pcdh10a         | 0.96164774 | 0.990581773 |
| ENSDARG00000078190 | zgc:193751      | 0.95889253 | 1.005726256 |
| ENSDARG00000079850 | dchs1b          | 0.9587979  | 0.967569051 |
| ENSDARG00000075724 | pcdh2g1         | 0.95821391 | 1.008117677 |
| ENSDARG00000055825 | celsr3          | 0.95738893 | 0.981420691 |
| ENSDARG00000074386 | CDH12 (1 of 2)  | 0.95736595 | 0.998751855 |
| ENSDARG00000077771 | pcdh2g28        | 0.9560345  | 1.025879077 |
| ENSDARG00000074595 | pcdh2aa3        | 0.95602607 | 1.059356695 |
| ENSDARG00000089805 | pcdh18a         | 0.95598575 | 0.981046223 |
| ENSDARG00000071893 | pcdh2g4         | 0.95567123 | 1.078366477 |
| ENSDARG00000074959 | pcdh2g3         | 0.95554817 | 1.042684765 |
| ENSDARG00000019063 | FAT1 (1 of 2)   | 0.95468492 | 1.020134804 |
| ENSDARG00000014215 | cdh13           | 0.95030325 | 0.997214899 |
| ENSDARG00000037478 | CDH8            | 0.94743074 | 1.002028646 |
| ENSDARG00000090614 | BX005294.4      | 0.94697125 | 1.030584532 |
| ENSDARG00000089562 | BX957322.2      | 0.94650917 | 1.013223548 |
| ENSDARG00000078898 | pcdh7a          | 0.94598526 | 0.968654207 |
| ENSDARG00000077996 | CDH24 (2 of 2)  | 0.94435186 | 1.0096718   |
| ENSDARG00000091043 | pcdh2ab6        | 0.94287036 | 1.038341039 |
| ENSDARG00000036121 | pcdh10b         | 0.94147247 | 1.001641085 |
| ENSDARG00000062720 | pcdh1a          | 0.94049128 | 0.995317351 |
| ENSDARG00000067692 | CDH18 (1 of 2)  | 0.9393701  | 1.001919273 |
| ENSDARG00000027041 | pcdh17          | 0.93906712 | 1.002631778 |
| ENSDARG00000063264 | PCDH9           | 0.93491401 | 1.011713838 |

|                    |                |            |             |
|--------------------|----------------|------------|-------------|
| ENSDARG00000079640 | pcdh2g16       | 0.93254535 | 1.028956493 |
| ENSDARG00000015002 | cdh4           | 0.93192655 | 0.986572104 |
| ENSDARG00000073883 | clstn3         | 0.92933325 | 0.96812777  |
| ENSDARG00000079937 | pcdh2g5        | 0.92930065 | 1.040329386 |
| ENSDARG00000010684 | CU915772.1     | 0.92664645 | 1.044601918 |
| ENSDARG00000079424 | CT573264.5     | 0.92578984 | 1.025192872 |
| ENSDARG00000071889 | pcdh2g8        | 0.92567154 | 1.017677281 |
| ENSDARG00000076461 | pcdh1g18       | 0.92448386 | 1.013495562 |
| ENSDARG00000089593 | pcdh2ab11      | 0.92442931 | 1.081910785 |
| ENSDARG00000077343 | CT573264.2     | 0.92439966 | 1.007783568 |
| ENSDARG00000076707 | pcdh2g29       | 0.92432192 | 1.016904131 |
| ENSDARG00000058875 | pcdh2ac        | 0.92271158 | 0.999411367 |
| ENSDARG00000061371 | cdh18          | 0.92186093 | 1.007141149 |
| ENSDARG00000075978 | pcdh1gc5       | 0.92179439 | 1.021230489 |
| ENSDARG00000074738 | pcdh2g9        | 0.92117006 | 1.026385513 |
| ENSDARG00000071890 | pcdh2g7        | 0.92000759 | 1.044900978 |
| ENSDARG00000086307 | CR847851.1     | 0.91975801 | 1.053116715 |
| ENSDARG00000090748 | pcdh2ab9       | 0.9136902  | 1.043222668 |
| ENSDARG00000091924 | pcdh1a3        | 0.91289555 | 0.971663508 |
| ENSDARG00000071891 | pcdh2g6        | 0.91107869 | 1.046691315 |
| ENSDARG00000043951 | pcdh1g9        | 0.9089895  | 1.0174073   |
| ENSDARG00000073755 | pcdh1g22       | 0.90835506 | 1.020525641 |
| ENSDARG00000088475 | pcdh1gb9       | 0.90430472 | 1.016772813 |
| ENSDARG00000078940 | pcdh2g12       | 0.90323167 | 1.01595193  |
| ENSDARG00000071904 | pcdh2ab1       | 0.90288208 | 1.04685759  |
| ENSDARG00000091395 | CABZ01067945.1 | 0.90254863 | 1.003201934 |
| ENSDARG00000088724 | pcdh2ab10      | 0.90196094 | 1.01224514  |
| ENSDARG00000087974 | pcdh2ab3       | 0.90037477 | 1.017588922 |
| ENSDARG00000088053 | CR847851.3     | 0.89998212 | 1.076413693 |
| ENSDARG00000078400 | BX005294.3     | 0.89804356 | 1.026523736 |
| ENSDARG00000086619 | CR847851.2     | 0.89753577 | 1.088564338 |
| ENSDARG00000076107 | pcdh1gb9       | 0.89503401 | 1.042119653 |
| ENSDARG00000078226 | CDH12 (2 of 2) | 0.89385193 | 1.018187538 |
| ENSDARG00000088522 | CR847851.5     | 0.89308955 | 1.091425554 |
| ENSDARG00000037286 | DCHS2          | 0.8923997  | 1.008159164 |
| ENSDARG00000042586 | PCDH8          | 0.89044839 | 0.986307413 |
| ENSDARG00000076459 | pcdhb          | 0.88931256 | 0.971096819 |
| ENSDARG00000071905 | pcdh2ab3       | 0.88754309 | 1.051433279 |
| ENSDARG00000075260 | CT573264.1     | 0.88413008 | 1.019786473 |
| ENSDARG00000061909 | CU855896.1     | 0.88276655 | 0.985840525 |
| ENSDARG00000089297 | CR847851.8     | 0.88162566 | 1.070734704 |

|                    |            |            |             |
|--------------------|------------|------------|-------------|
| ENSDARG00000089874 | pcdh2ab8   | 0.88139414 | 1.071984548 |
| ENSDARG00000088136 | CR847851.4 | 0.8802254  | 1.035509734 |
| ENSDARG00000077867 | CT573264.3 | 0.87933268 | 0.999591888 |
| ENSDARG00000088587 | CR847851.5 | 0.87902786 | 1.102082902 |
| ENSDARG00000055843 | cdh10      | 0.87192884 | 1.006616443 |
| ENSDARG00000037695 | pcdh2aa1   | 0.86646396 | 1.017812728 |
| ENSDARG00000077023 | CU855896.2 | 0.86523883 | 0.981751194 |
| ENSDARG00000077755 | zgc:162322 | 0.86464887 | 1.009955722 |
| ENSDARG00000087698 | AL929558.3 | 0.86394593 | 1.025060636 |
| ENSDARG00000086485 | AL929558.1 | 0.85528118 | 0.995347194 |
| ENSDARG00000073973 | pcdh2aa3   | 0.8548708  | 1.011555708 |
| ENSDARG00000006467 | pcdh8      | 0.83656495 | 1.007976907 |
| ENSDARG00000043961 | PCDH10     | 0.83631734 | 1.010869269 |
| ENSDARG00000087958 | pcdh2aa15  | 0.83098476 | 1.013656661 |
| ENSDARG00000076583 | pcdh2aa1   | 0.82576274 | 0.990707194 |
| ENSDARG00000088752 | pcdh2ab7   | 0.81761549 | 0.958570497 |
| ENSDARG00000088380 | AL929558.4 | 0.78406254 | 0.983555815 |
| ENSDARG00000088418 | AL929558.5 | 0.76717993 | 1.011396427 |
| ENSDARG00000086231 | CT573264.4 | 0.76684408 | 0.956704381 |

**Supplementary Table 1.** Morphant expression values for homophilic cell adhesion genes. Microarray expression fold-changes in *pitx2ab* and *tbx5a* morphants are shown for genes annotated as being involved in ‘homophilic cell adhesion’ (GO:0007156).
